# Supplementary material for: Function outperforms morphology in the assessment of muscular contribution to insulin sensitivity in premenopausal women
Source: PubMed Central journal article supplement — Diab Vasc Dis Res. 2022 Mar 31;19(1):14791641211070281. doi: 10.1177/14791641211070281 (PMC8977731; doi:10.1177/14791641211070281), 2022-03-31
Supplement: sj-pdf-1-dvr-10.1177_14791641211070281.pdf [file sj-pdf-1-dvr-10.1177_14791641211070281.pdf]

**Table s1: Baseline characteristics of the clamp subcohort in comparison to whole study cohort**

|                                         |                                      | whole study cohort  | clamp subcohort     |
|-----------------------------------------|--------------------------------------|---------------------|---------------------|
| n                                       |                                      | 144                 | 30                  |
| Clinical parameters                     | age, yrs.                            | 35.7 ± 4.1          | 35.3 ± 3.7          |
|                                         | height, cm                           | 167.3 ± 6.5         | 165.7 ± 6.2         |
|                                         | weight, kg                           | 69.8 ± 13.9         | 70.1 ± 15.4         |
|                                         | BMI, kg/m <sup>2</sup>               | 25.0 ± 5.3          | 25.6 ± 6.1          |
|                                         | waist circumference, cm              | 80.6 ± 11.3         | 81.0 ± 13.3         |
|                                         | time after delivery, months          | 9.2 ± 2.8           | 8.7 ± 2.9           |
| Glucose tolerance category              | NGT                                  | 109 (76%)           | 22 (73%)            |
|                                         | IFG                                  | 14 (10%)            | 3 (10%)             |
|                                         | IGT                                  | 12 (8%)             | 2 (7%)              |
|                                         | IFG + IGT                            | 5 (3%)              | 2 (7%)              |
|                                         | T2DM                                 | 4 (3%)              | 1 (3%)              |
| Metabolic status in preceding pregnancy | Normoglycemia                        | 50 (35%)            | 11 (37%)            |
|                                         | GDM                                  | 94 (65%)            | 19 (66%)            |
| Insulin sensitivity                     | ISI                                  | 5.8 (3.5-7.8)       | 4.9 (3.0-8.2)       |
|                                         | M/(ffm*I) (n=30)                     | 137.8 (96.4-173.5)  | 137.8 (96.4-173.5)  |
| MRI/MRS                                 | MV, dm <sup>3</sup>                  | 1.32 (1.16-1.42)    | 1.26 (1.13-1.34)    |
|                                         | MVI, dm <sup>3</sup> /m <sup>2</sup> | 0.47 (0.43-0.50)    | 0.46 (0.43-0.49)    |
|                                         | IMCL, % (n=117/n=27)                 | 0.94 (0.62-1.43)    | 1.11 (0.87-1.80)    |
| Cardiopulmonary exercise testing        | VO <sub>2peak</sub> , ml/min         | 1852 (1664-2080)    | 1833 (1611-1975)    |
|                                         | VO <sub>2peak</sub> /kg, ml/kg/min   | 27.6 (23.1-31.2)    | 28.3 (20.2-31.0)    |
|                                         | W <sub>max</sub> , W                 | 130.6 (111.0-148.5) | 128.5 (110.5-141.8) |

Normally distributed variables are given as mean ± SD, non-normally distributed variables as median (Q1, Q3), categorical variables as n (percent). No significant differences between the two cohorts were observed. BMI (body mass index), ISI (insulin sensitivity index), M/(ffm\*I) (M-value derived from hyperinsulinemic, euglycemic clamp test, divided by fat free body mass times steady-state plasma insulin), MV (muscle volume), MVI (muscle volume index), IMCL (intramyocellular lipid content) VO<sub>2peak</sub> (peak oxygen uptake), and W<sub>max</sub> (maximum workload). OGTT (oral glucose tolerance test), pGDM (post gestational diabetes), controls (euglycemic pregnancy), IFG (impaired fasting glucose), IGT (impaired glucose tolerance), T2DM (type 2 diabetes mellitus).
